# Supplementary material
Source: publisher site journal article supplement (https://www.spandidos-publications.com/1441/downloadSupplementary)

Figure S1. Bxpc-3 and MIApaca-2 cell lines were transfected with psuper, psuper-UBE2T, HA or HA-UBE2T. The overexpression of HA/UBE2T/HA-UBE2T in pancreatic cancer cells was confirmed. UBE2T, ubiquitin-conjugating enzyme E2T.

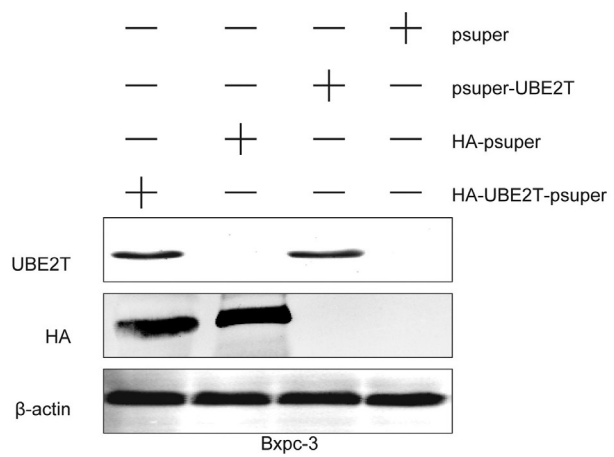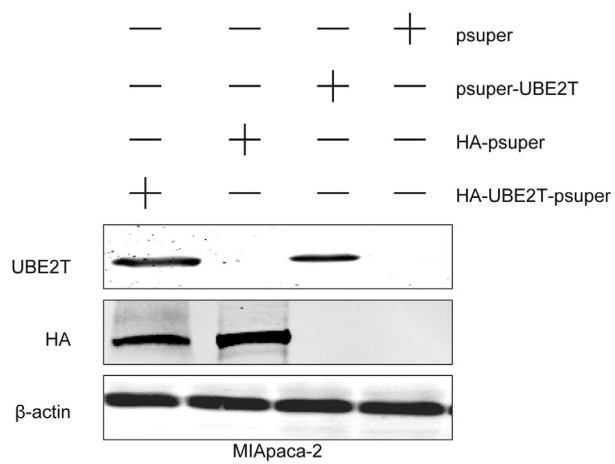

Supplement: Supplementary file 1 [file downloadSupplementary]
